# Supplementary material for: Morroniside regulates hair growth and cycle transition via activation of the Wnt/β-catenin signaling pathway
Source: PubMed Central journal article supplement (PMC6137235; doi:10.1038/s41598-018-32138-2), 2018-09-13
Supplement: 41598_2018_32138_MOESM1_ESM.pdf [file 41598_2018_32138_MOESM1_ESM.pdf]

# Morroniside regulates hair growth and cycle transition via activation of the Wnt/ $\beta$ -catenin signaling pathway

Lijuan Zhou<sup>#1</sup>, Han Wang<sup>#1</sup>, Jing Jing<sup>1</sup>, Lijuan Yu<sup>1</sup>, Xianjie Wu<sup>1</sup>, Zhongfa Lu<sup>1,\*</sup>

## Supplementary Figures

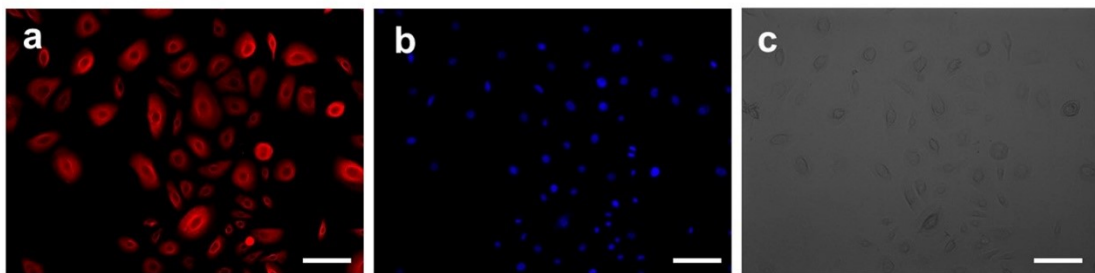

Supplementary Figure S1. Keratin 14 staining for ORSCs *in vitro*. a. ORSCs were stained for keratin 14 under a fluorescence microscope. b. ORSCs were stained for DAPI under a fluorescence microscope. c. ORSCs were observed under a normal microscope.

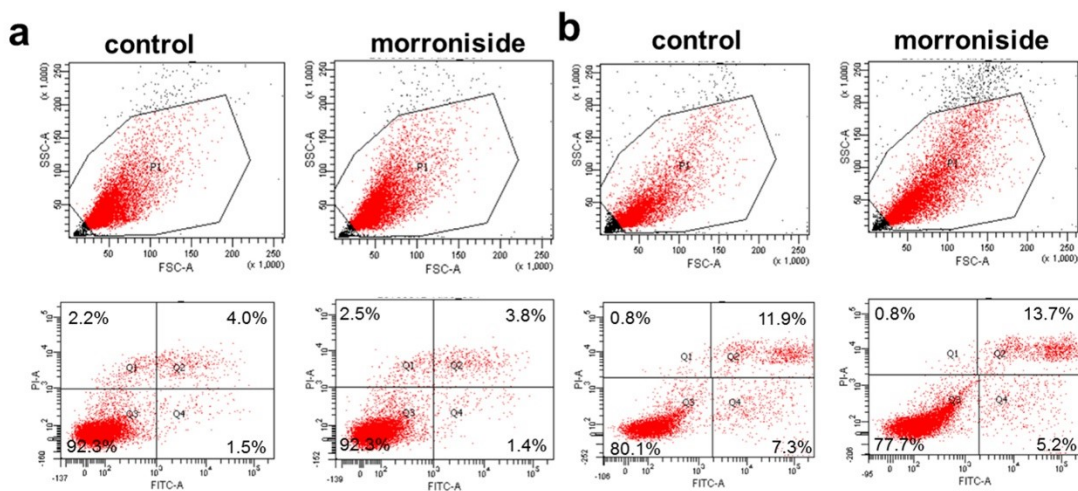

Supplementary Figure S2. Morroniside treatment had no significant effects on

**ORSCs apoptosis in vitro. a-b.** Representative pictures show the effect of morroniside treatment on ORSC apoptosis rate for 24 h (a) and 72 h (b) determined by flow cytometry. The morroniside-treated group showed no significant change compared with the control group after 24 h or 72 h.

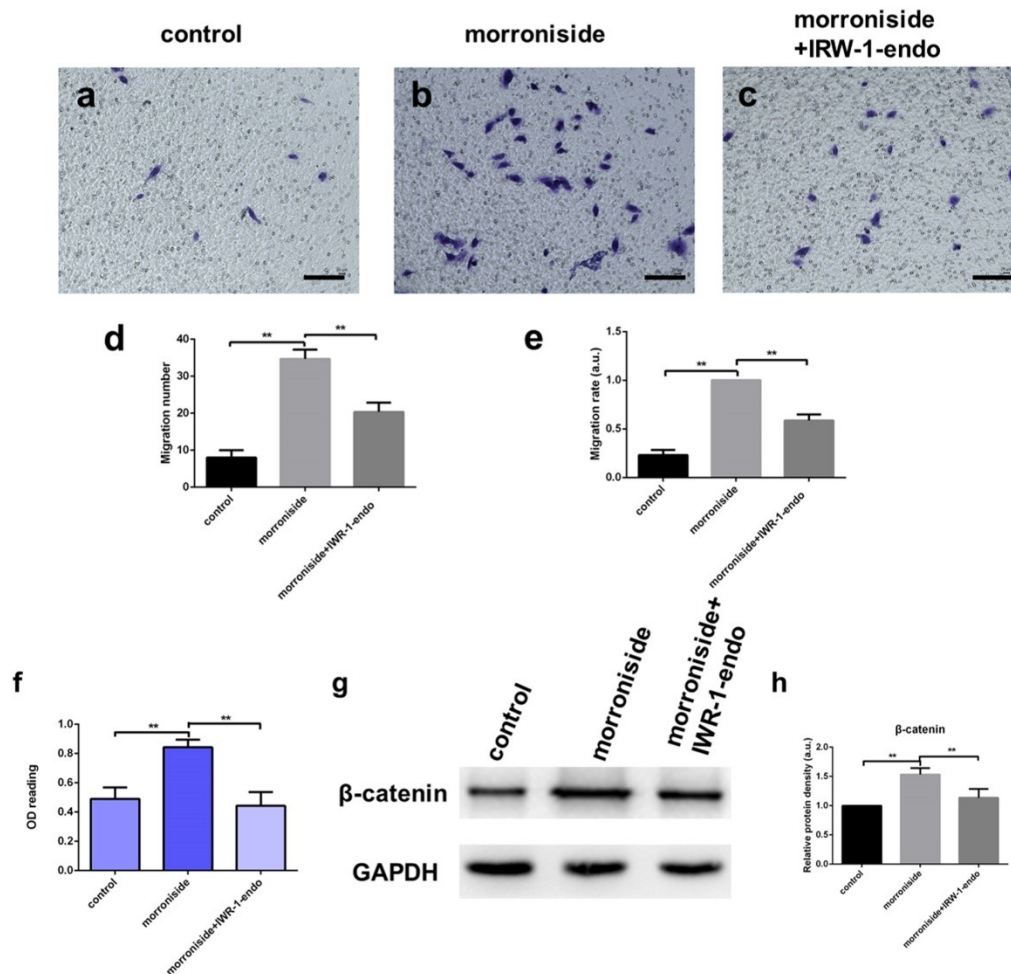

**Supplementary Figure S3. The increased proliferation, migration, and  $\beta$ -catenin expression caused by morroniside were partially rescued by the addition of a Wnt/ $\beta$ -catenin signaling inhibitor (IRW-1-endo).**

**a-e.** Transwell assays of ORSCs in control, morroniside and morroniside + IRW-1-endo groups. **f.** The proliferation of ORSCs in the control, morroniside and morroniside + IRW-1-endo groups was measured by MTS assays. **g-h.**  $\beta$ -catenin

protein levels in control, morroniside and morronside + IRW-1-endo groups were determined by western blotting. a.u., arbitrary units.
